# Supplementary material
Source: publisher site journal article supplement (https://www.dovepress.com/article/527449)
Supplement: Supplementary file 1 [file 527449%20Supplementary%20Material.docx]

**Supplementary Material:**


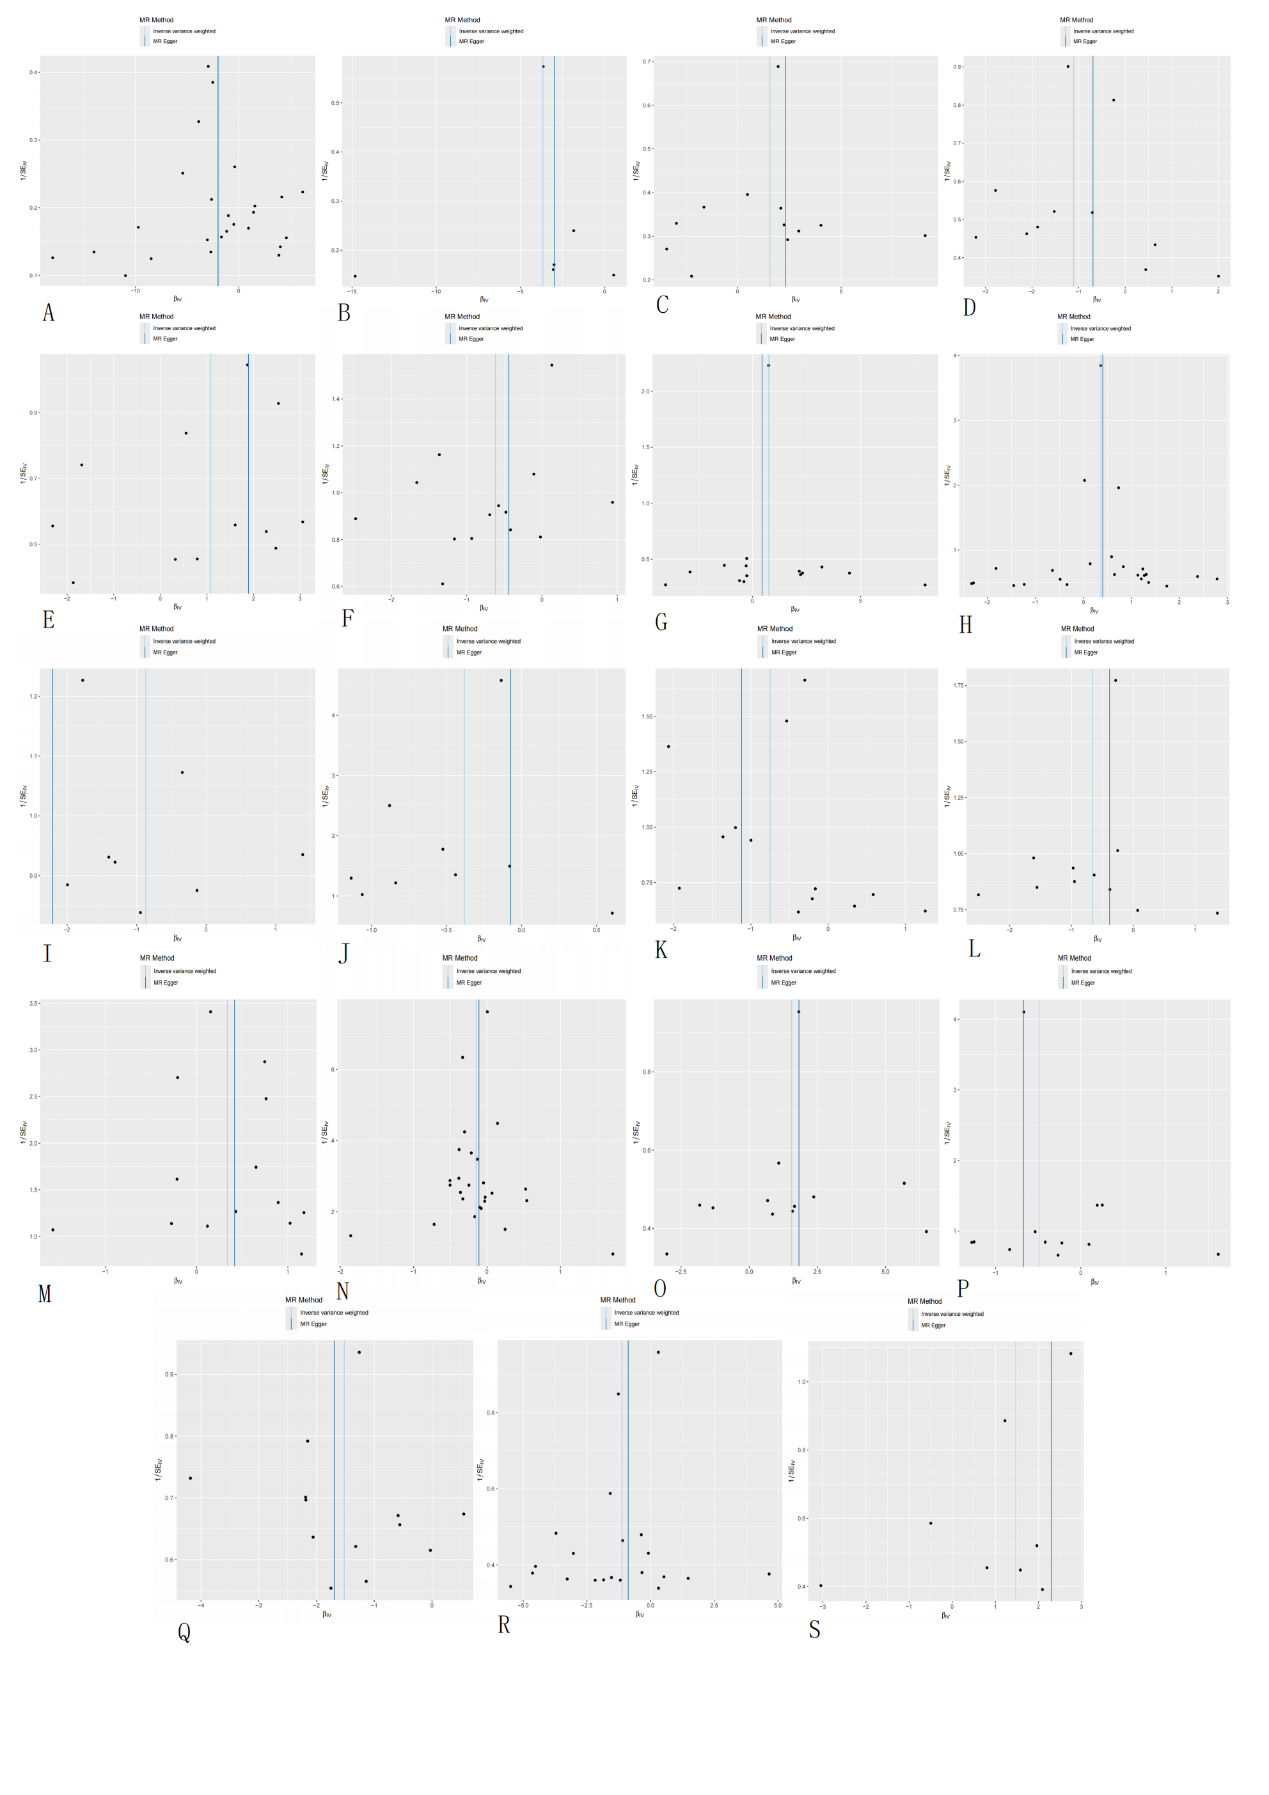


**Supplementary Figure S1:** Funnel plots for the causal association between plasma metabolites and MGMs. (A) Creatinine (B) Valine (C) Glycerol 3−phosphate (G3P) (D) X−04495 (E) Eicosapentaenoate (F) 1−linoleoylglycerol (G) X−10810 (H) Butyrylcarnitine (I) X−11540 (J) X−12013 (K) Gamma−tocopherol (L) X−12212 (M) X−10346 (N) X−12435 (O) 1−stearoylglycerophosphocholine (P) Epiandrosterone sulfate (Q) Laurylcarnitine (R) X−13435 (S) X−13553


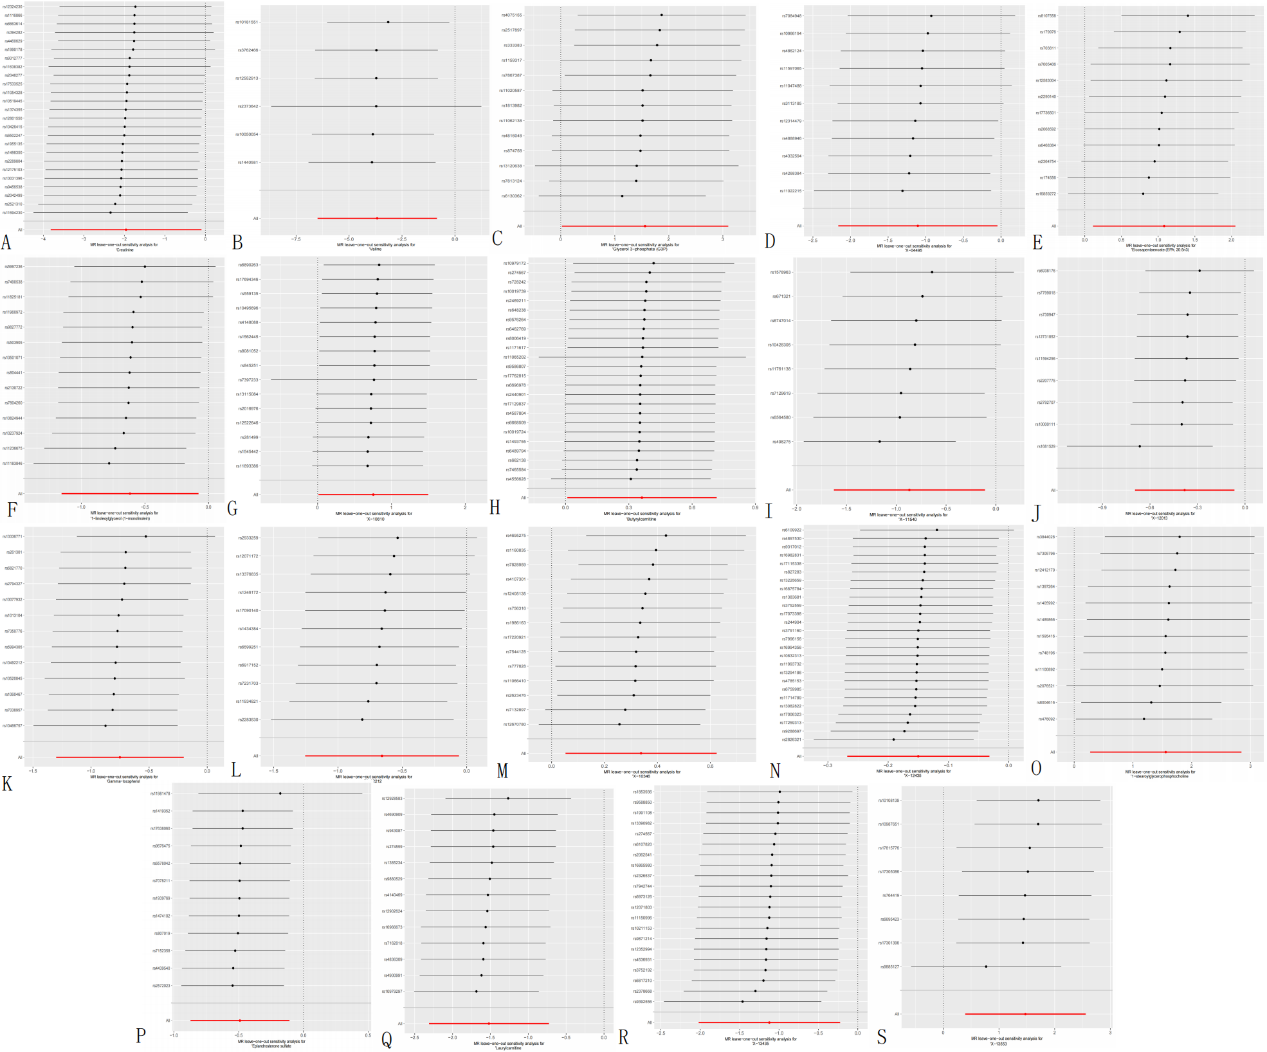


**Supplementary Figure S2:** Leave-one-out plots for the causal association between plasma metabolites and MGMs. (A) Creatinine (B) Valine (C) Glycerol 3−phosphate (G3P) (D) X−04495 (E) Eicosapentaenoate (F) 1−linoleoylglycerol (G) X−10810 (H) Butyrylcarnitine (I) X−11540 (J) X−12013 (K) Gamma−tocopherol (L) X−12212 (M) X−10346 (N) X−12435 (O) 1−stearoylglycerophosphocholine (P) Epiandrosterone sulfate (Q) Laurylcarnitine (R) X−13435 (S) X−13553


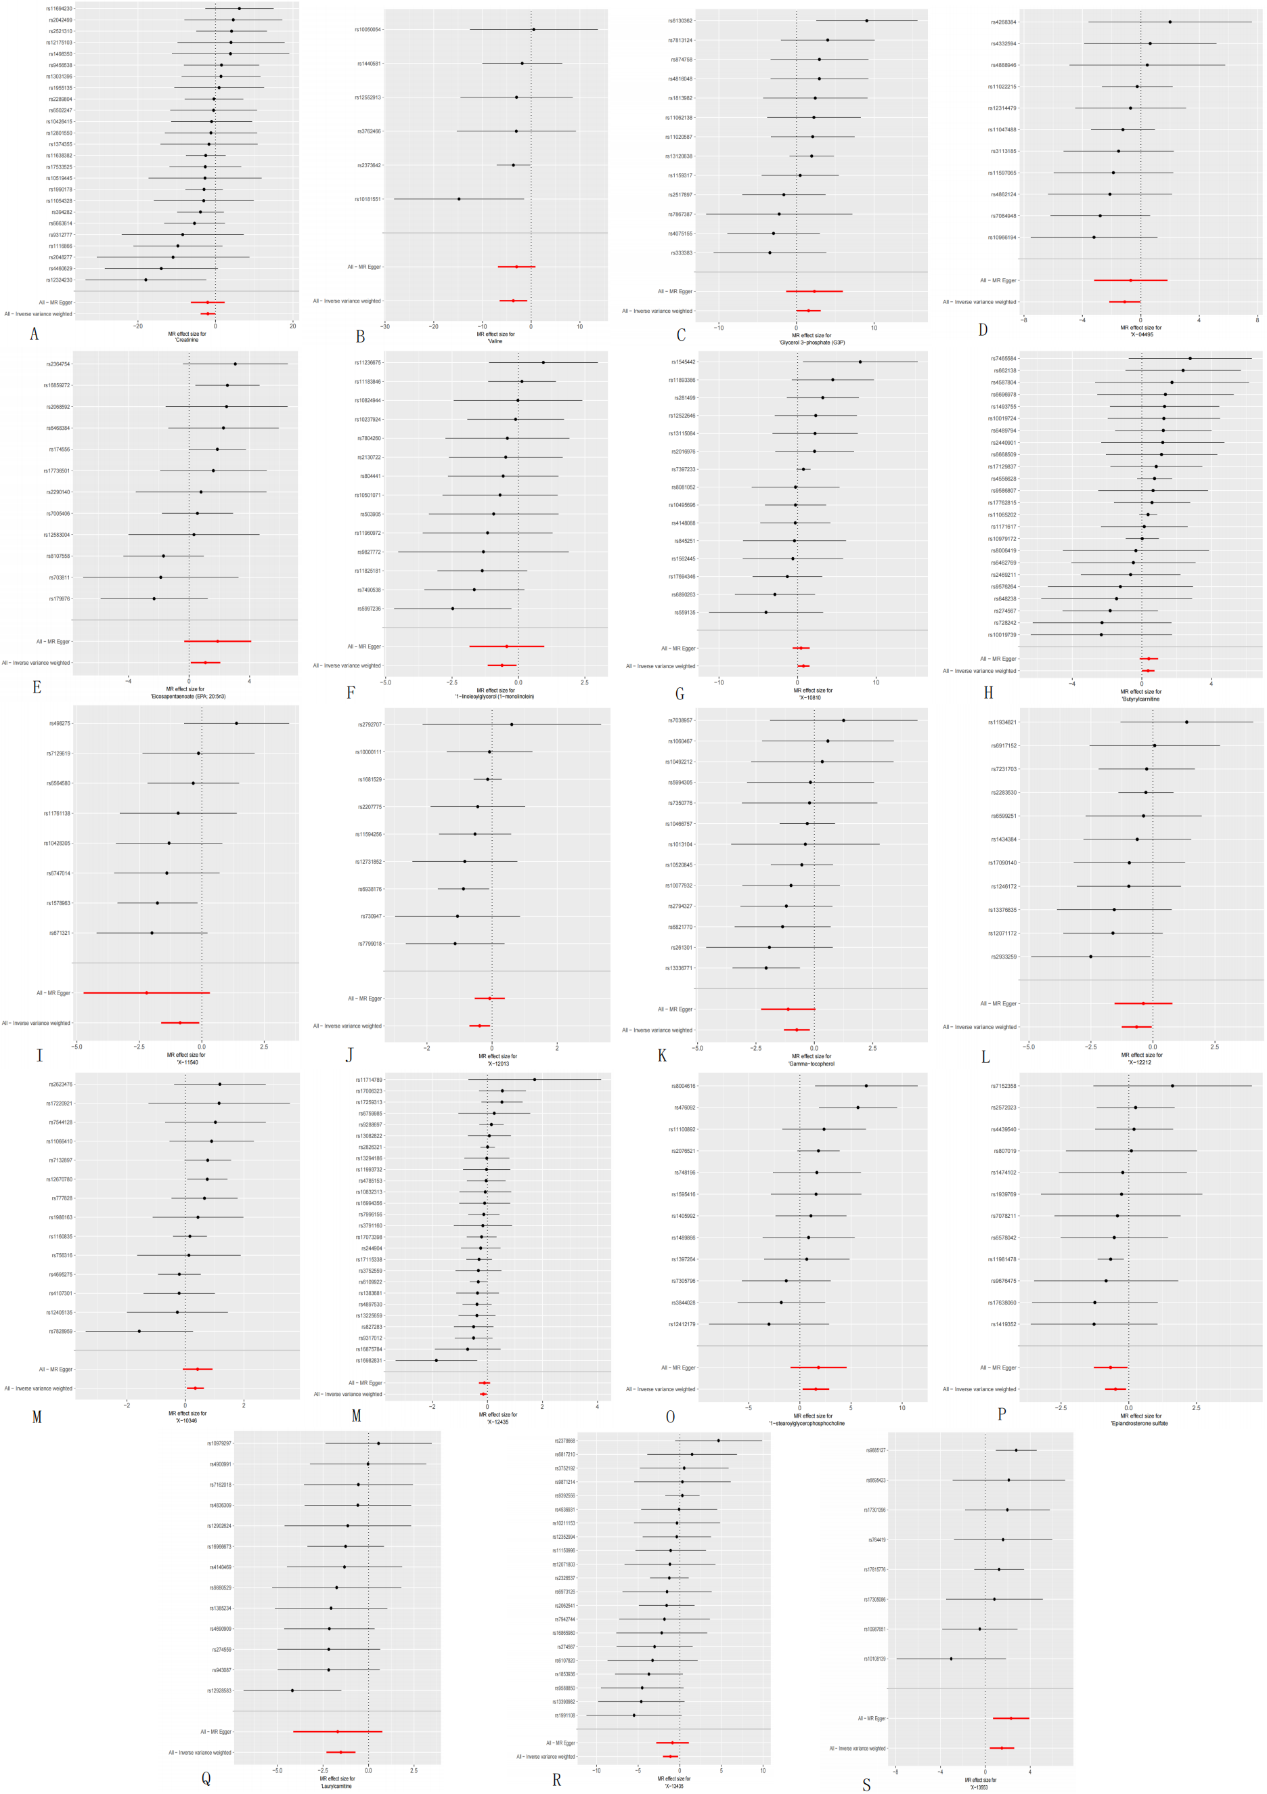


**Supplementary Figure S3:** Forest plots for the causal association between plasma metabolites and MGMs. (A) Creatinine (B) Valine (C) Glycerol 3−phosphate (G3P) (D) X−04495 (E) Eicosapentaenoate (F) 1−linoleoylglycerol (G) X−10810 (H) Butyrylcarnitine (I) X−11540 (J) X−12013 (K) Gamma−tocopherol (L) X−12212 (M) X−10346 (N) X−12435 (O) 1−stearoylglycerophosphocholine (P) Epiandrosterone sulfate (Q) Laurylcarnitine (R) X−13435 (S) X−13553


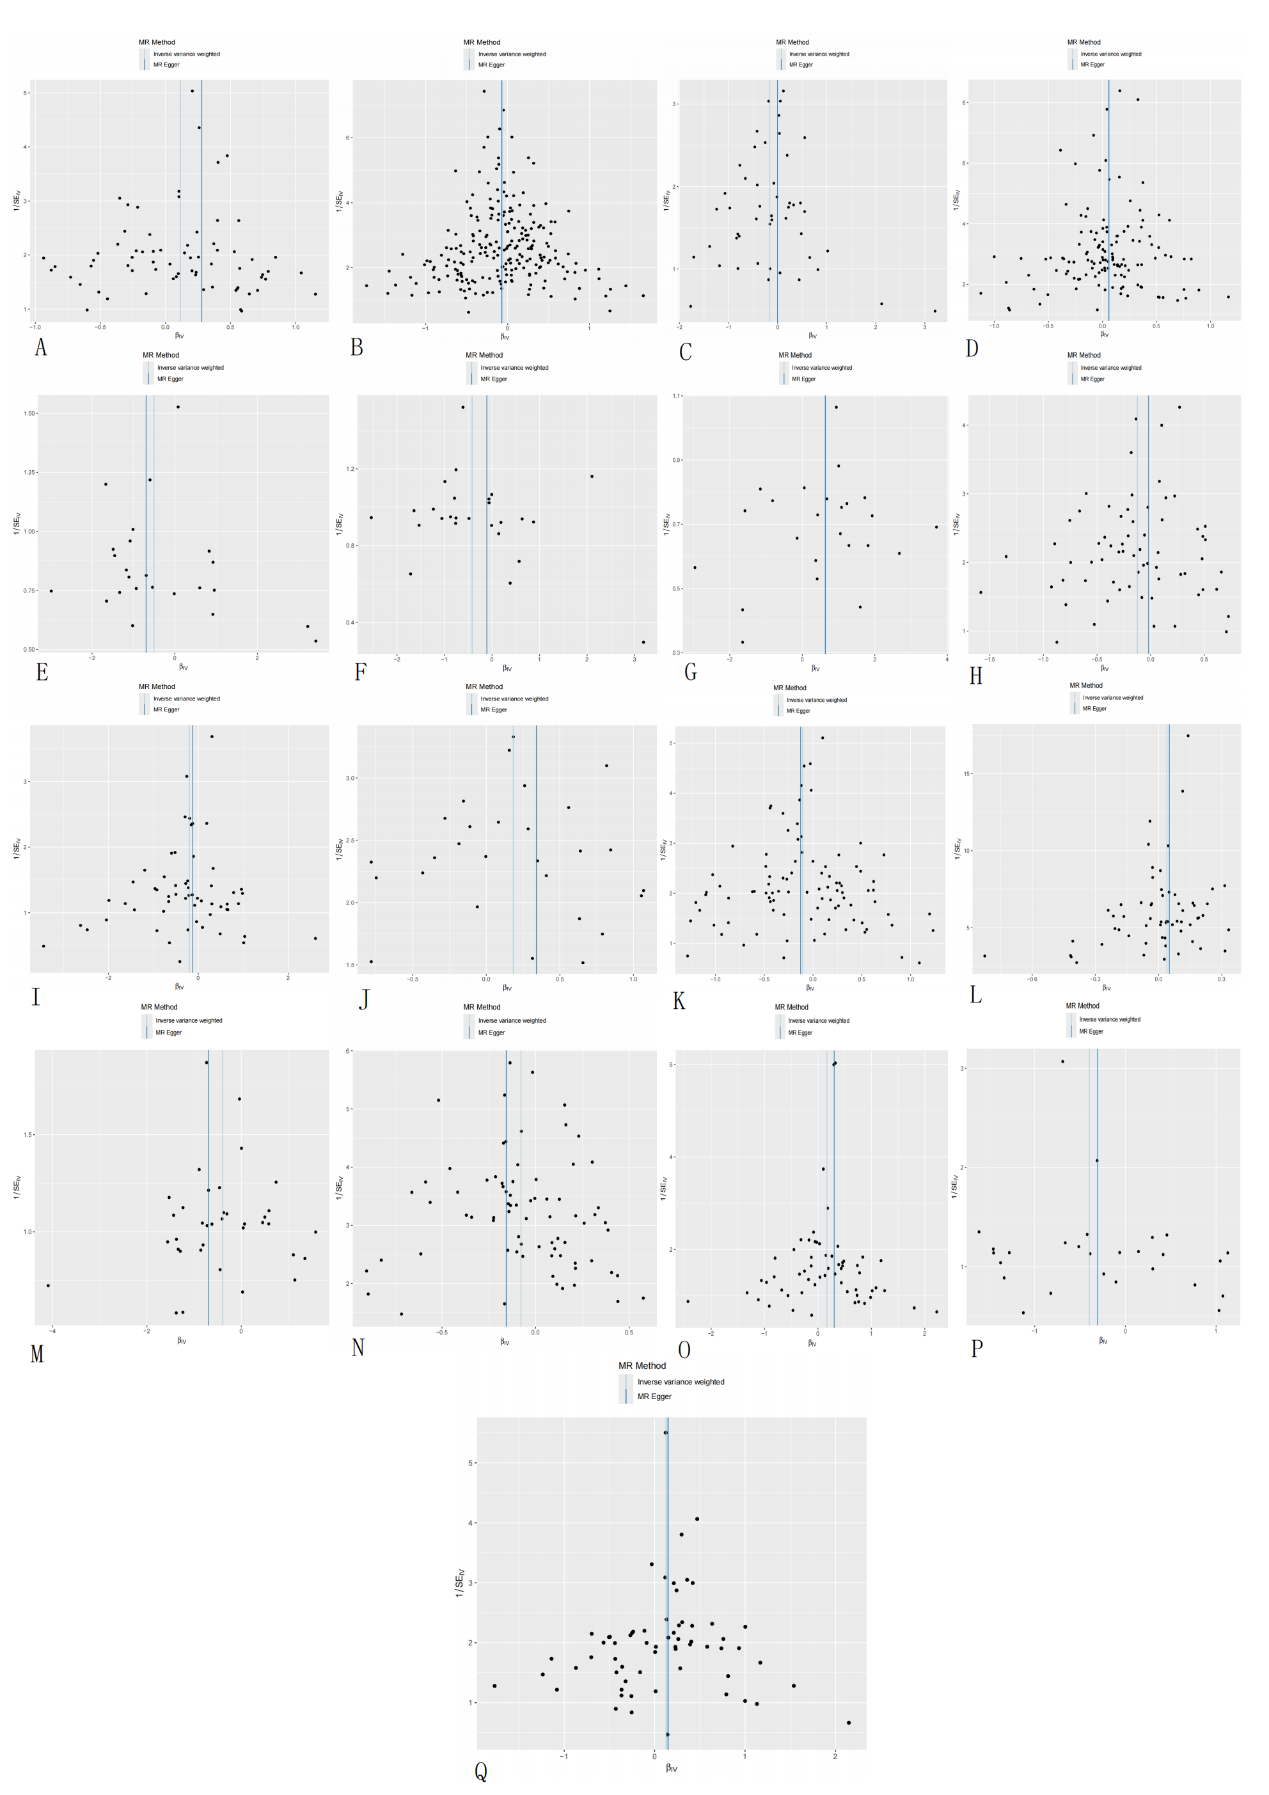


**Supplementary Figure S4:** Funnel plots for the causal association between cerebrospinal fluid metabolites and MGMs. (A) Cortisol (B) Sphingomyelin (C) 1−palmitoyl−2−stearoyl−gpc (D) 2'−deoxyuridine (E) 2'−deoxyuridine (F) Arabinose (G) Creatine (H) Gamma−glutamylvaline (I) Guanosine (J) Homostachydrine (K) Ribulonate/xylulonate (L)Theobromine (M) Threonine (N) X−11787 (O) X−15674 (P) X−24452 (Q) X−25109


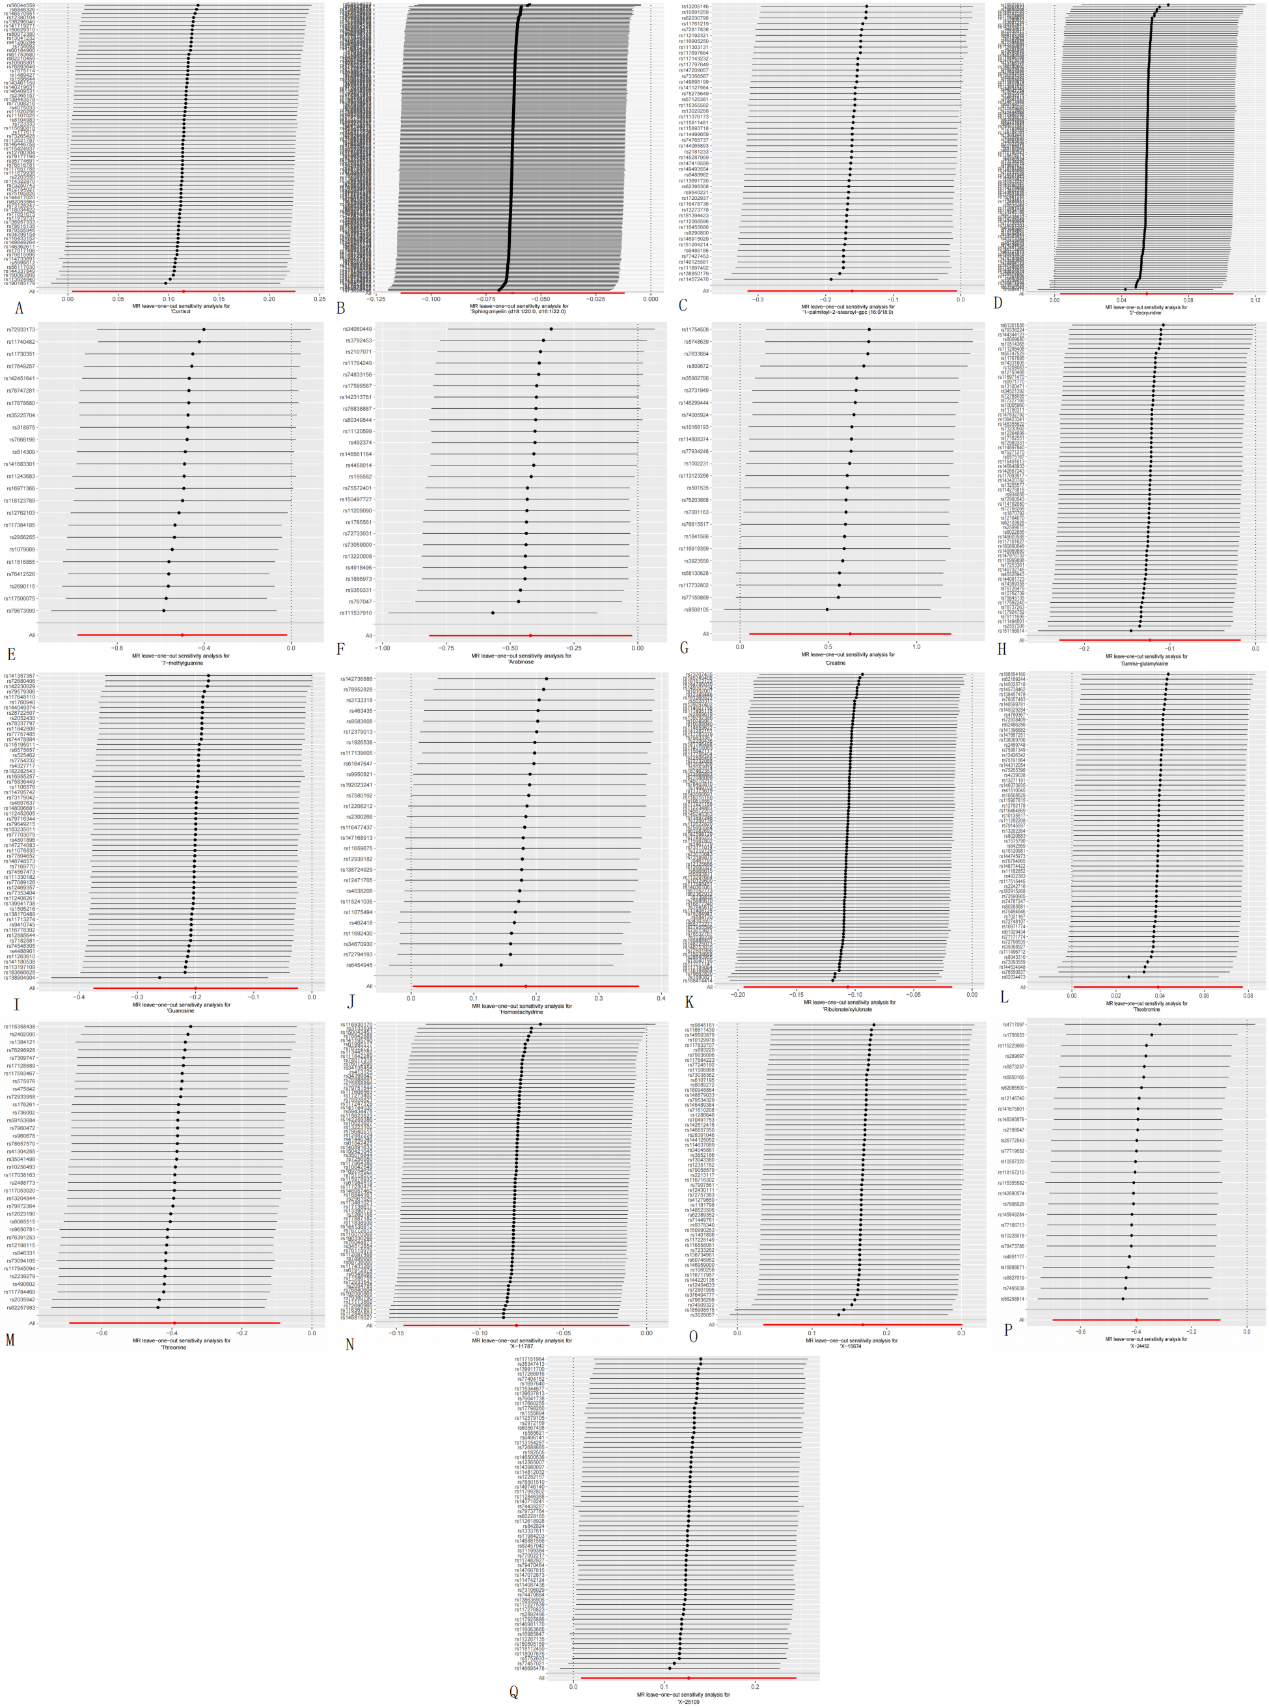


**Supplementary Figure S5:** Leave-one-out plots for the causal association between cerebrospinal fluid metabolites and MGMs. (A) Cortisol (B) Sphingomyelin (C) 1−palmitoyl−2−stearoyl−gpc (D) 2'−deoxyuridine (E) 2'−deoxyuridine (F) Arabinose (G) Creatine (H) Gamma−glutamylvaline (I) Guanosine (J) Homostachydrine (K) Ribulonate/xylulonate (L)Theobromine (M) Threonine (N) X−11787 (O) X−15674 (P) X−24452 (Q) X−25109


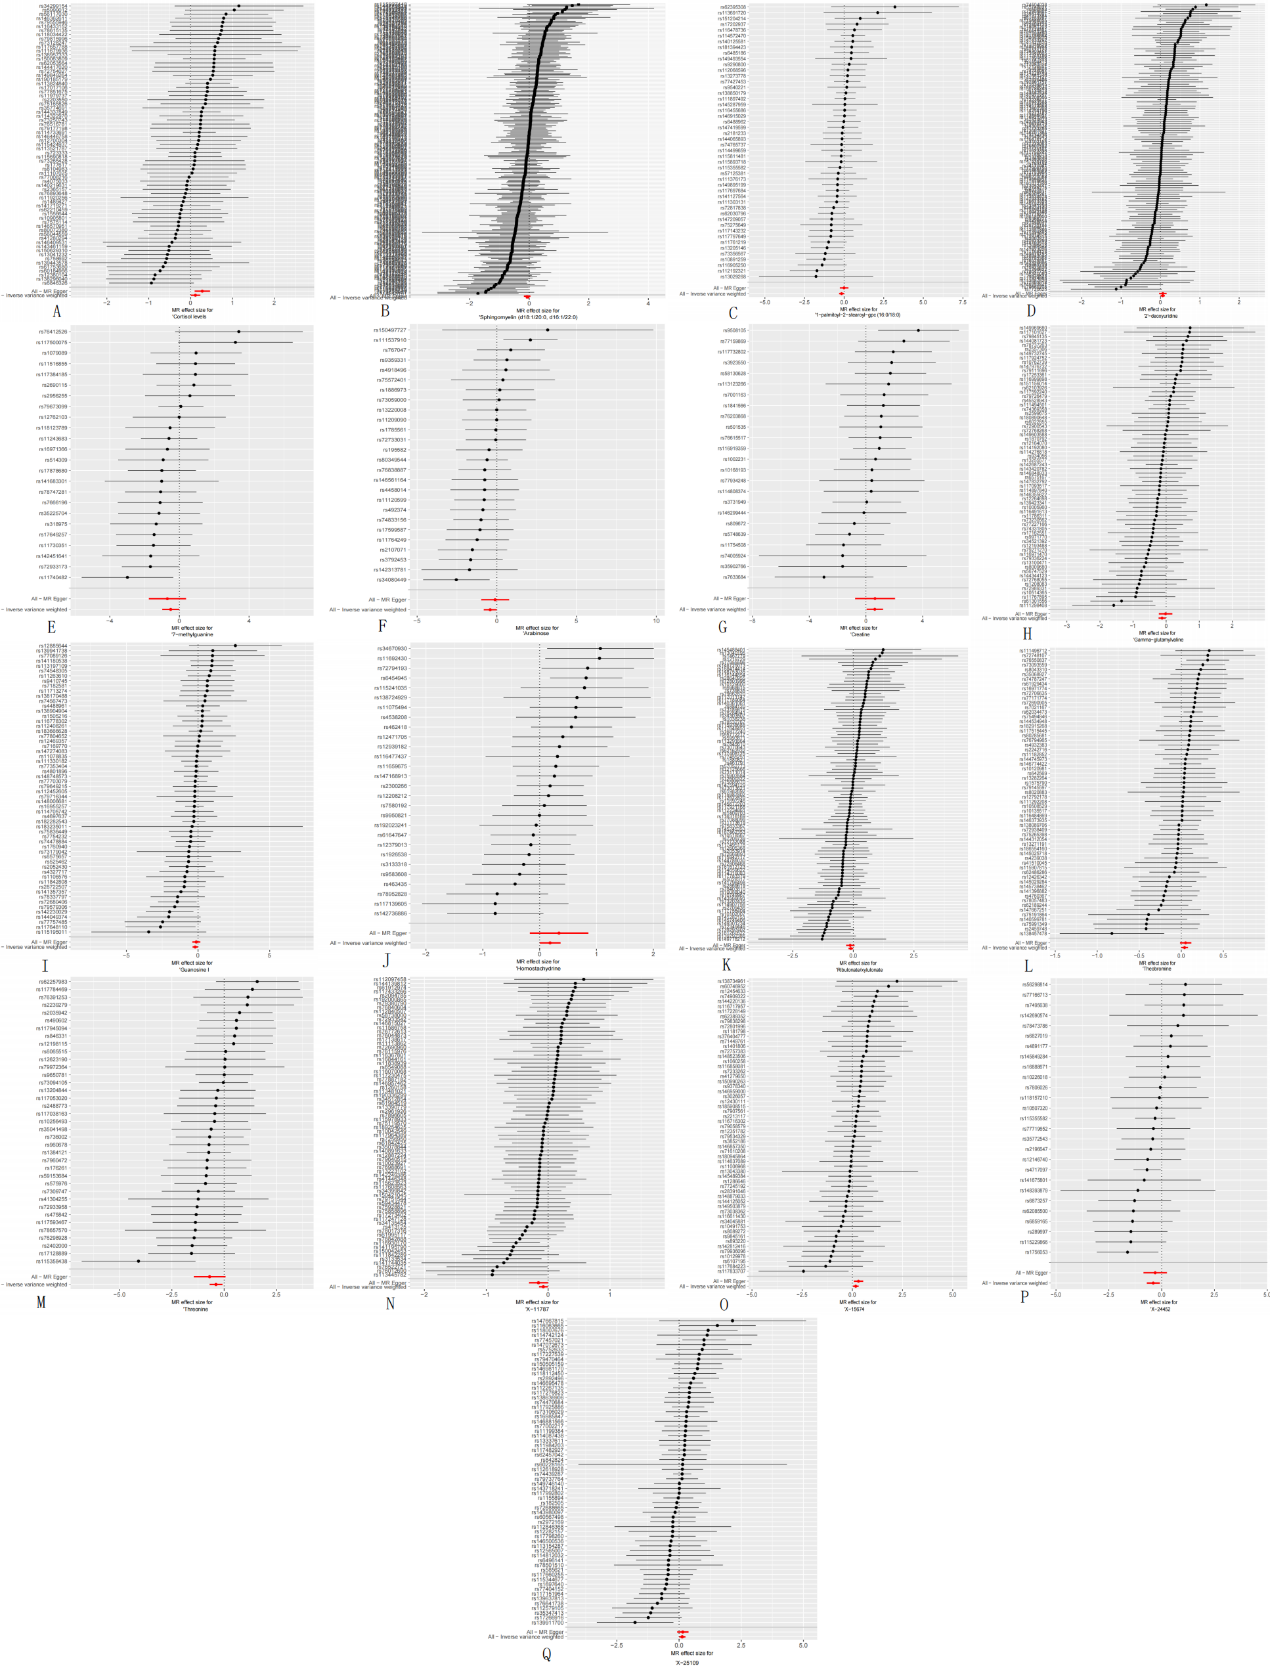


**Supplementary Figure S6:** Forest plots for the causal association between cerebrospinal fluid metabolites and MGMs. (A) Cortisol (B) Sphingomyelin (C) 1−palmitoyl−2−stearoyl−gpc (D) 2'−deoxyuridine (E) 2'−deoxyuridine (F) Arabinose (G) Creatine (H) Gamma−glutamylvaline (I) Guanosine (J) Homostachydrine (K) Ribulonate/xylulonate (L)Theobromine (M) Threonine (N) X−11787 (O) X−15674 (P) X−24452 (Q) X−25109
